# Supplementary material for: Hydrothermal assisted in situ growth of CoSe onto graphene nanosheets as a nanohybrid positive electrode for asymmetric supercapacitors
Source: Royal Society of Chemistry journal article supplement (doi:10.1039/c6ra25078e), 2017-01-01
Supplement: c6ra25078e1.pdf [file c6ra25078e1.pdf]

## Electronic Supplementary Information (ESI†)

### Hydrothermal assisted in-situ growth of CoSe/Graphene nanohybrid as a positive electrode for asymmetric supercapacitor

Balakrishnan Kirubasankar, Vignesh Murugadoss and Subramania Angaiah\*  
Electrochemical Energy Research Lab, Centre for Nanoscience and Technology,  
Pondicherry University, Puducherry - 605014, India  
\*(Corresponding author e-mail: [a.subramania@gmail.com](mailto:a.subramania@gmail.com))

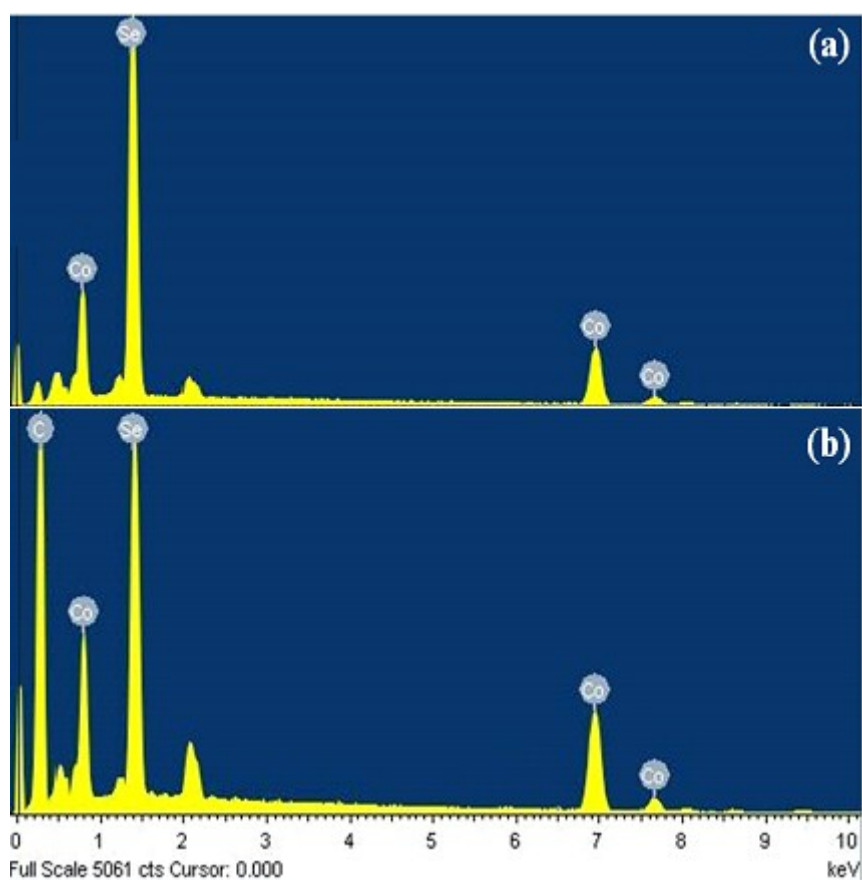

**Fig. S1.** EDX of (a) CoSe nanoparticles and (b) CoSe-G nanohybrid

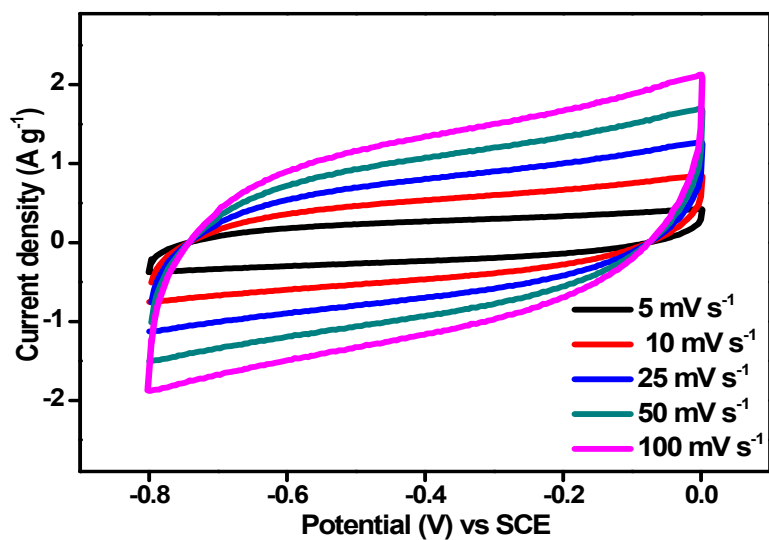

**Fig. S2.** Cyclic voltammograms of graphene electrode at various scan rates (5 – 100 mVs<sup>-1</sup>) in 6 M KOH solution.

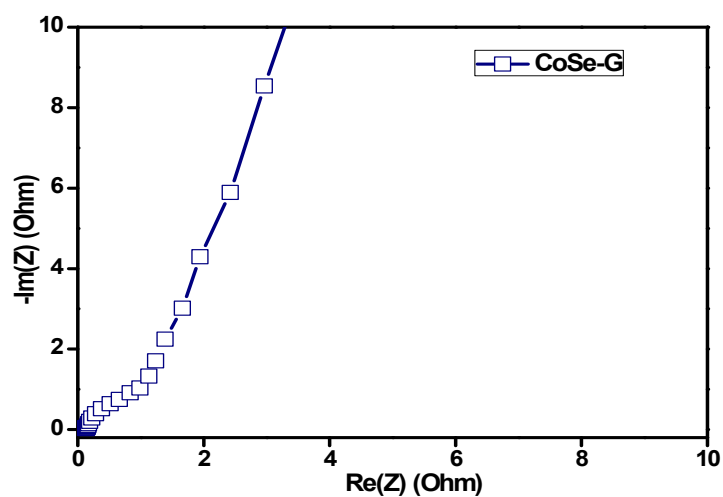

**Fig. S3.** Nyquist plot of CoSe-G electrode in 6M KOH solution (An enlarged version).

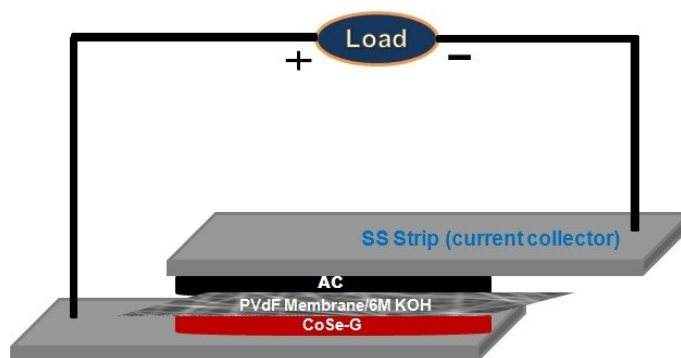

**Fig. S4.** Schematic illustration of CoSe-G || AC asymmetric supercapacitor
